# Supplementary material
Source: Springer Nature journal article supplement (https://www.springermedizin.de/resource/supplementary/12974_2008_167_MOESM3_ESM.pdf/9600916)

A

Protein content  
(relative to mock)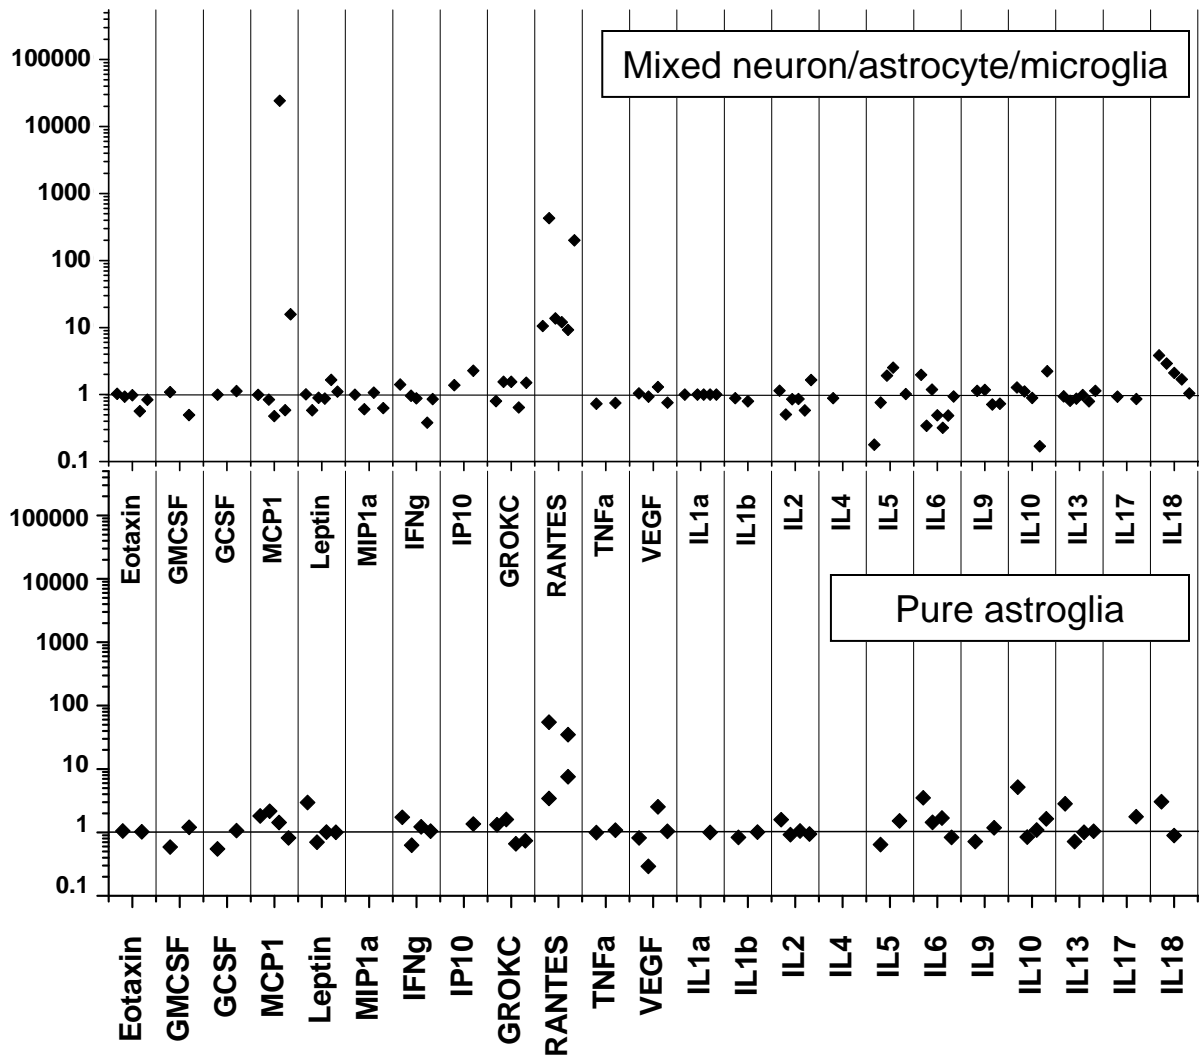

Supplement: MOESM3 [file 9600916]
